# Supplementary material
Source: PubMed Central journal article supplement (PMC6775993)

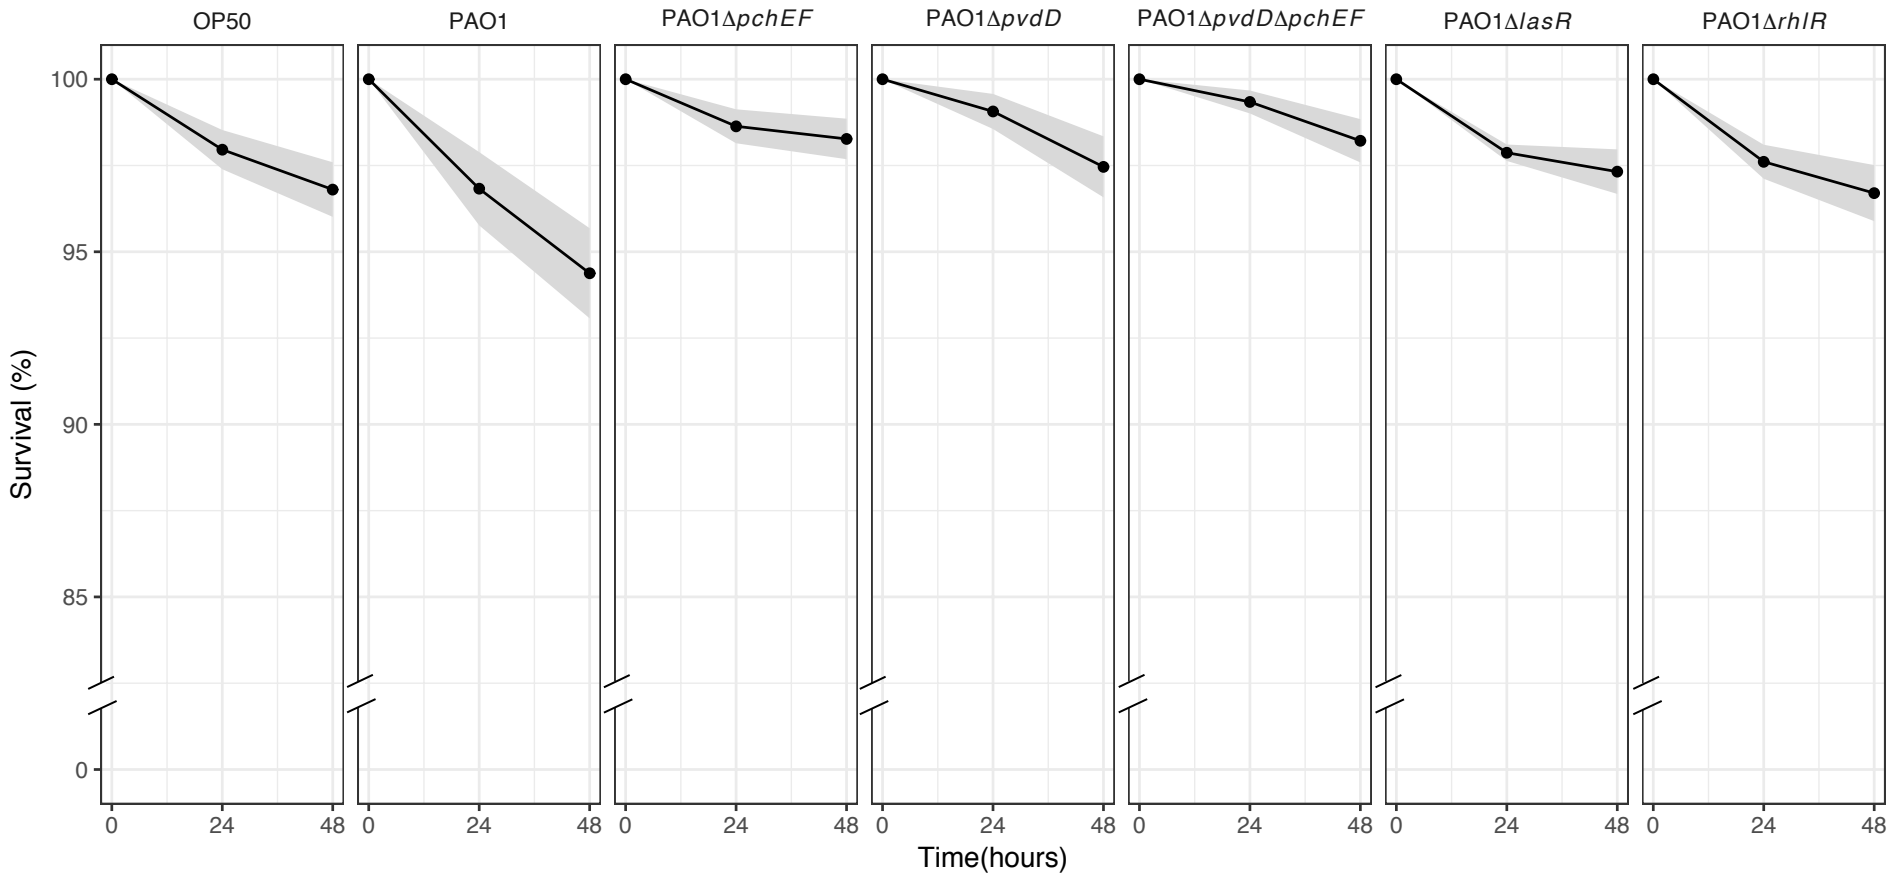

Supplement: 41396_2019_442_MOESM3_ESM.pdf [file 41396_2019_442_MOESM3_ESM.pdf]
