# Supplementary material
Source: PubMed Central journal article supplement (PMC6775993)

A - Observation at 0 hpe

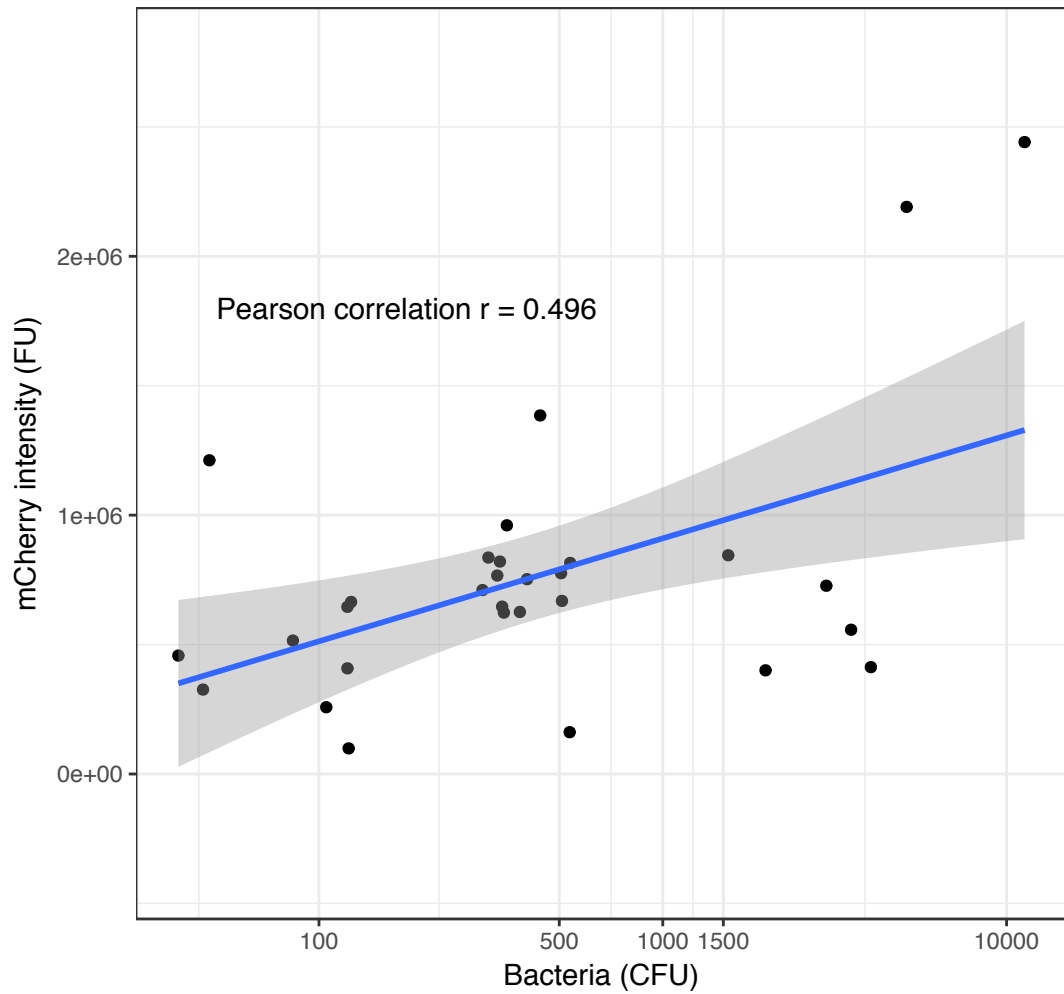

B - Observation at 6 hpe

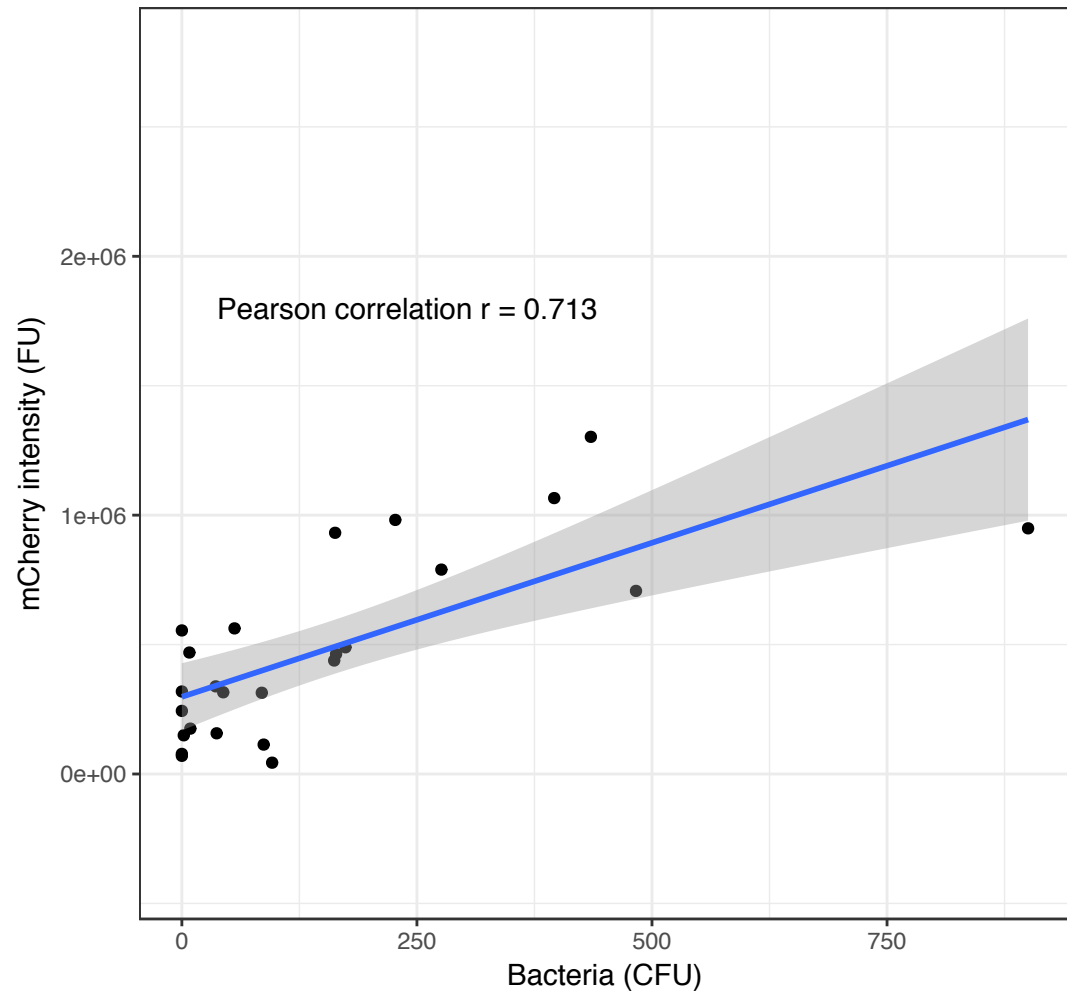

Supplement: 41396_2019_442_MOESM4_ESM.pdf [file 41396_2019_442_MOESM4_ESM.pdf]
