# Supplementary material
Source: PubMed Central journal article supplement (PMC6775993)
Supplement: 41396_2019_442_MOESM5_ESM.pdf [file 41396_2019_442_MOESM5_ESM.pdf]

# Decline in bacterial load at 6 hpe

Bacterial load relative to the initial uptake

$(\ln(\text{fluorescence at 6 hpe} / \text{fluorescence at 0 hpe}))$

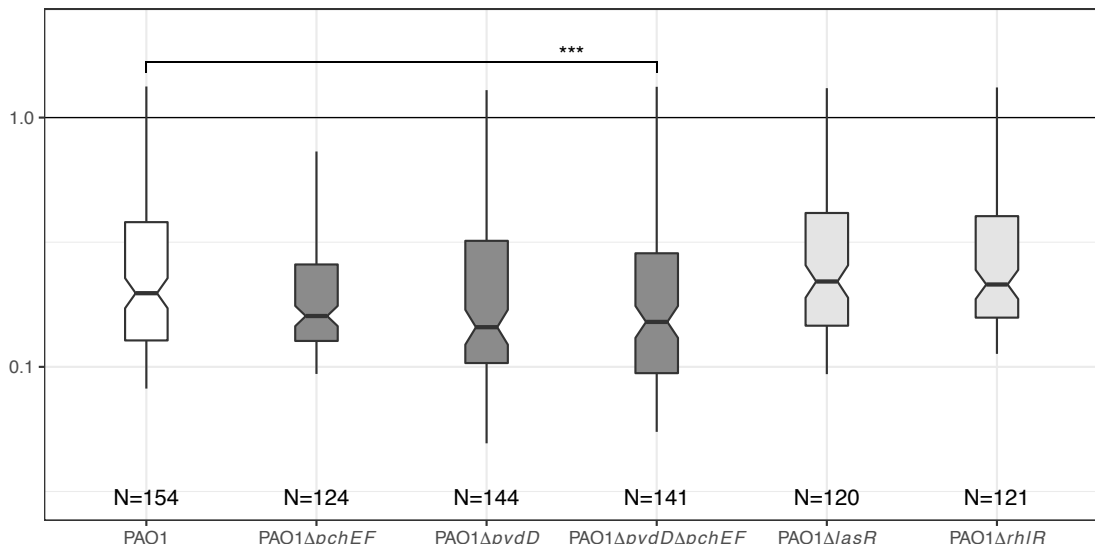

Strain

Strain type  PAO1  Siderophore mutants  QS mutants
