# Supplementary material
Source: PubMed Central journal article supplement (PMC6775993)
Supplement: 41396_2019_442_MOESM6_ESM.pdf [file 41396_2019_442_MOESM6_ESM.pdf]

A

*pvdA::mCherry*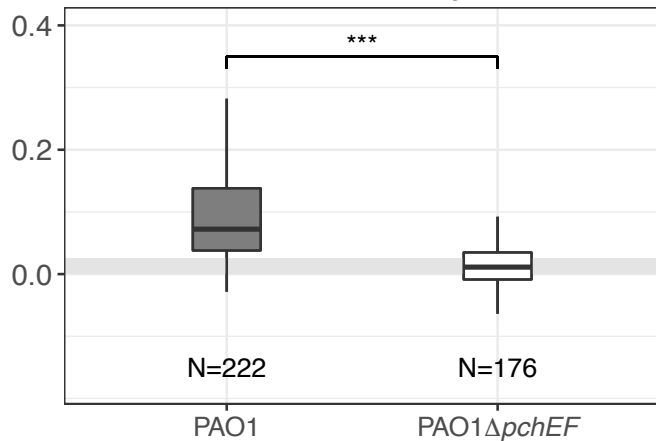

B

*pchEF::mCherry*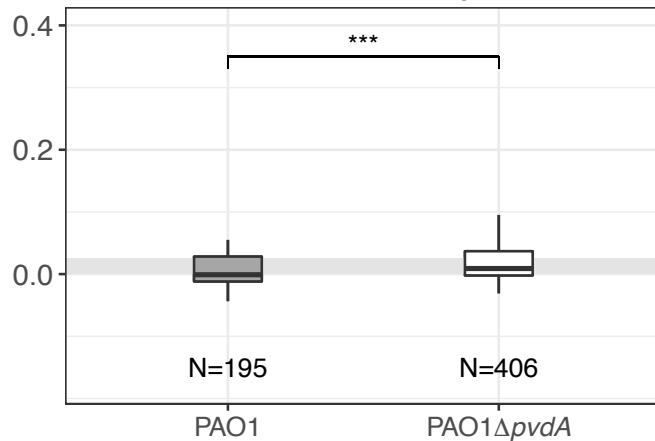

C

*lasR::mCherry*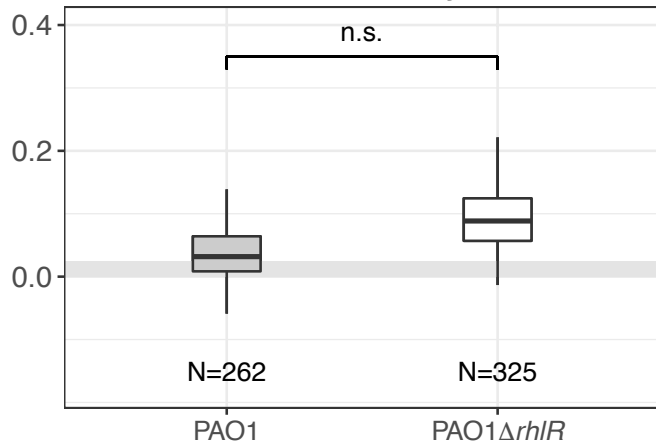

D

*rhIR::mCherry*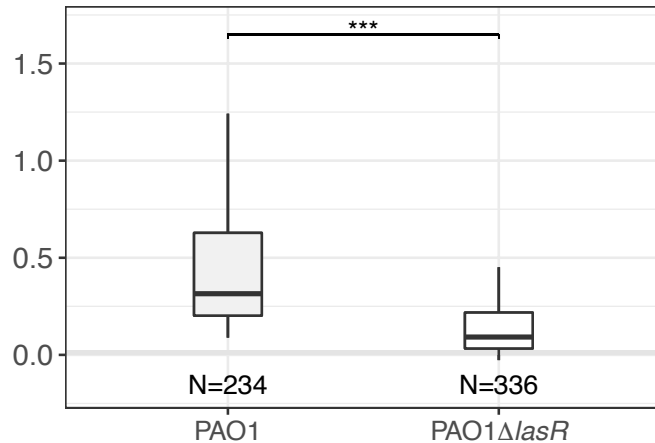

Strain
